# Supplementary material for: Overcoming energy loss of thermally activated delayed fluorescence sensitized-OLEDs by developing a fluorescent dopant with a small singlet–triplet energy splitting
Source: Royal Society of Chemistry journal article supplement (doi:10.1039/d1tc05700f), 2021-12-29
Supplement: d1tc05700f1.pdf [file d1tc05700f1.pdf]

# Overcome energy loss of thermally activated delayed fluorescence sensitized-OLEDs by developing fluorescence dopant with a small singlet-triplet energy splitting

Xinye Wang<sup>†</sup>, Yifan Zhang<sup>†</sup>, Ze Yu, Yuan Wu, Dongdong Wang\*, Chuanming Wu, Huili Ma\*, Shuya Ning, Hua Dong and Zhaoxin Wu

## Electronic Supplementary Information

### Contents

|                                                                           |    |
|---------------------------------------------------------------------------|----|
| <b>Section 1: Computational details</b> .....                             | S1 |
| <b>Section 2: Synthesis details</b> .....                                 | S1 |
| <b>Section 3: Supplementary figures</b> .....                             | S4 |
| Figure S1 The TGA, DSC and CV curves of the 67dTPA-FQ and 267tTPA-FQ..... | S4 |
| <b>Section 4: <sup>1</sup>H NMR and HRMS spectra</b> .....                | S5 |
| <b>Section 5: Reference</b> .....                                         | S7 |

## Section 1: Computational details

Molecular geometry optimizations were performed for the ground (S0) and excited (S1) states at the level of (TD)B3LYP/M062X. Based on the S1-geometry, the excitation energies and natural transition orbitals (NTO) of the low-lying excited states were evaluated at the TD-B3LYP/ M062X level. All calculations were performed by using Gaussian 09 program<sup>1</sup>. The spin-orbit coupling matrix elements of singlet and triplet excited states were carried out based on the first-order Douglas–Kroll–Hess-like spin–orbit operator derived from the exact two-component (X2C) Hamiltonian by using Beijing Density Function (BDF) program.<sup>2-5</sup>

## Section 2:

### Synthesis of materials

All reagents were used without further purification. The <sup>1</sup>H NMR spectra were recorded on Bruker Avance 400 MHz spectrometers and HRMS experiments were carried out on a Thermo Scientific LTQ Orbitrap Discovery (Bremen, Germany).

### Synthesis of intermediate (1a and 1b)

6,7-dibromo-2,3-dichloroquinoxaline (0.6 g, 1.68 mmol) was dissolved in MeCN (20 mL), then Pd(PPh<sub>3</sub>)<sub>2</sub>Cl<sub>2</sub> (5 mol-%) and CuI (5 mol-%) were added. The reaction flask was then sealed and flushed with nitrogen. Then, Et<sub>3</sub>N (2.5 equiv.) and ethynylbenzene (0.18 g, 1.75 mmol)/4-ethynyl-N,N-diphenylaniline (0.29g, 1.75 mmol) were added. The reaction mixture was stirred at 60 °C for 8 h. After the first coupling reaction was complete, TFA (35 mL) was added. The reaction mixture was then stirred at 60 °C until TLC revealed complete conversion of the intermediate into the final product. The mixture was then cooled, diluted with H<sub>2</sub>O and filtered. The residue was purified by silica gel column chromatography (CH<sub>2</sub>Cl<sub>2</sub> / petroleum ether) to give the corresponding product.

1a (0.6g, 88%): <sup>1</sup>H NMR (400MHz, CDCl<sub>3</sub>) δ(ppm): <sup>1</sup>H NMR (400 MHz, DMSO-d<sub>6</sub>) δ(ppm): 8.56 (s, 1H), 8.50 (s, 1H), 8.17-8.10 (m, 2H), 7.93 (s, 1H), 7.64-7.58 (m, 3H).

1b(0.8g, 83%): <sup>1</sup>H NMR (400MHz, CDCl<sub>3</sub>) δ(ppm): <sup>1</sup>H NMR (400 MHz, DMSO-d<sub>6</sub>) δ(ppm) : 8.49 (s, 1H), 8.43 (s, 1H), 8.01-7.94 (m, 2H), 7.64 (s, 1H), 7.43-7.35 (m, 4H), 7.22-7.13 (m, 6H), 7.01-6.95 (m, 2H).

### Synthesis of 67dTPA-FQ and 267tTPA-FQ

The compound 1a (0.6 g, 1.49 mmol)/1b (0.85 g, 1.49 mmol), (4-(diphenylamino)phenyl)boronic acid (1.07 g, 3.71 mmol), K<sub>2</sub>CO<sub>3</sub> (1.23 g, 8.91 mmol) and Pd(PPh<sub>3</sub>)<sub>4</sub> (0.086 g, 0.074 mmol) were added to 100 ml dioxane/H<sub>2</sub>O (4:1) mixed solvent. Then the reaction mixture was stirred at 120 °C under a nitrogen atmosphere until TLC revealed complete conversion of the starting material. The mixture was cooled, diluted with H<sub>2</sub>O and filtered. The residue was purified by silica gel column chromatography (CH<sub>2</sub>Cl<sub>2</sub>/petroleum ether) to gain the product.

67dTPA-FQ(0.88g, 81%): <sup>1</sup>H NMR (400MHz, CDCl<sub>3</sub>) δ(ppm): 8.16-8.12 (m, 2H), 8.12 (s, 1H), 8.04 (s, 1H), 7.92 (s, 1H), 7.66-7.54 (m, 3H), 7.30-7.20 (m, 7H), 7.14 (dd, J = 8.4, 2.0 Hz, 4H), 7.02 (dd, J = 15.2, 7.6 Hz, 13H), 6.90 (dd, J = 8.6, 2.6 Hz, 4H); <sup>13</sup>C NMR (101 MHz, Chloroform-d) δ(ppm) : 163.93, 154.96, 147.68, 147.07, 147.02, 144.45, 142.30, 141.86, 141.46, 138.24, 134.47, 134.40, 131.39, 130.93, 129.42, 129.31, 129.17, 129.13, 128.66, 126.29, 124.68, 123.16, 123.13, 122.84, 122.78, 100.99. HRMS (ESI) calcd for C<sub>46</sub>H<sub>32</sub>N<sub>4</sub>O [M+H]<sup>+</sup> 733.29601, found 733.29594.

267tTPA-FQ(1.0g, 79%): <sup>1</sup>H NMR (400 MHz, DMSO-d<sub>6</sub>) δ(ppm) : 8.05 (s, 1H), 7.99-7.92 (m, 3H), 7.61 (s, 1H), 7.41-7.34 (m, 4H), 7.25 (t, J = 7.6 Hz, 8H), 7.20-7.07 (m, 10H), 7.06-6.96 (m, 14H), 6.89 (dd, J = 8.7, 2.3 Hz, 4H); <sup>13</sup>C NMR (101 MHz, Chloroform-d) δ(ppm) : 147.68, 146.96, 146.58, 141.74, 134.53, 130.94, 129.77, 129.42, 129.11, 127.57, 125.92, 124.72, 124.65, 123.13, 123.10, 122.85, 122.78, 121.12. HRMS (ESI) calcd for C<sub>46</sub>H<sub>32</sub>N<sub>4</sub>O [M+H]<sup>+</sup> 900.36969, found 900.36915.

Section 3:

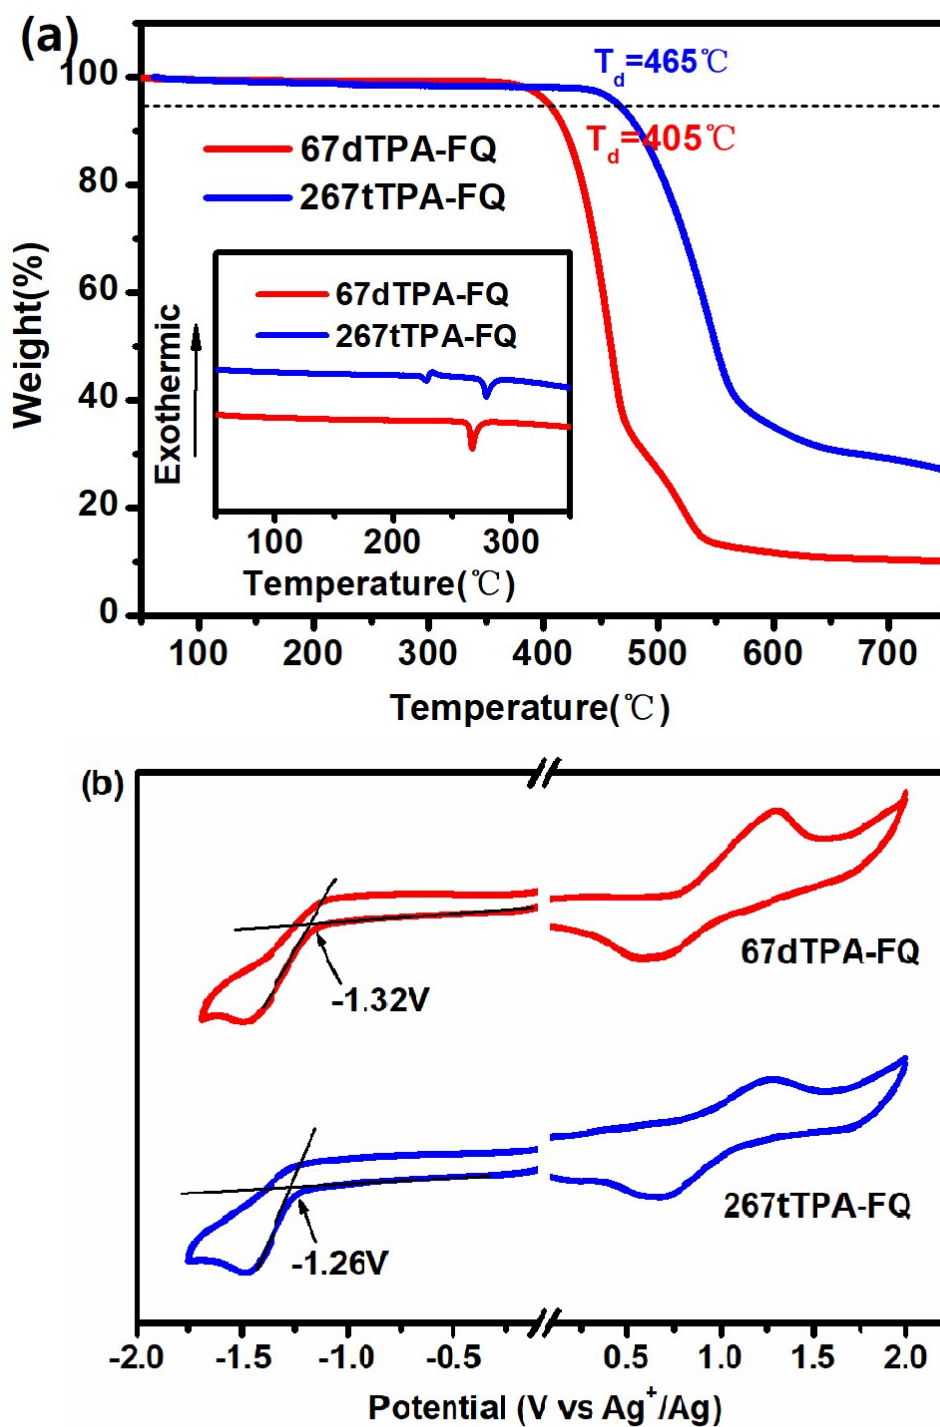

Figure S1(a) TGA and DSC (inset) curves, and (b) CV curves of the 67dTPA-FQ, and 267tTPA-FQ.

## Section 4: $^1\text{H}$ NMR spectra

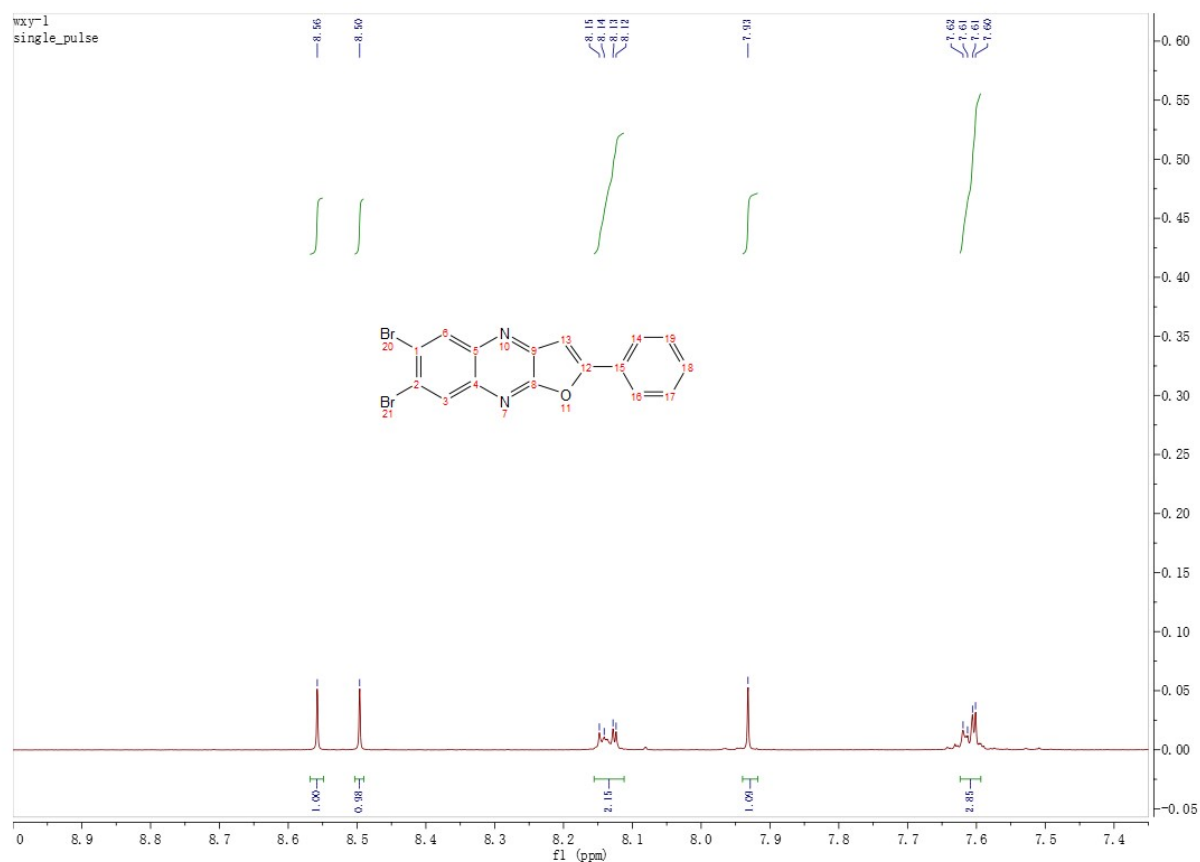

Figure S<sub>2</sub>  $^1\text{H}$  NMR spectrum of **1a**

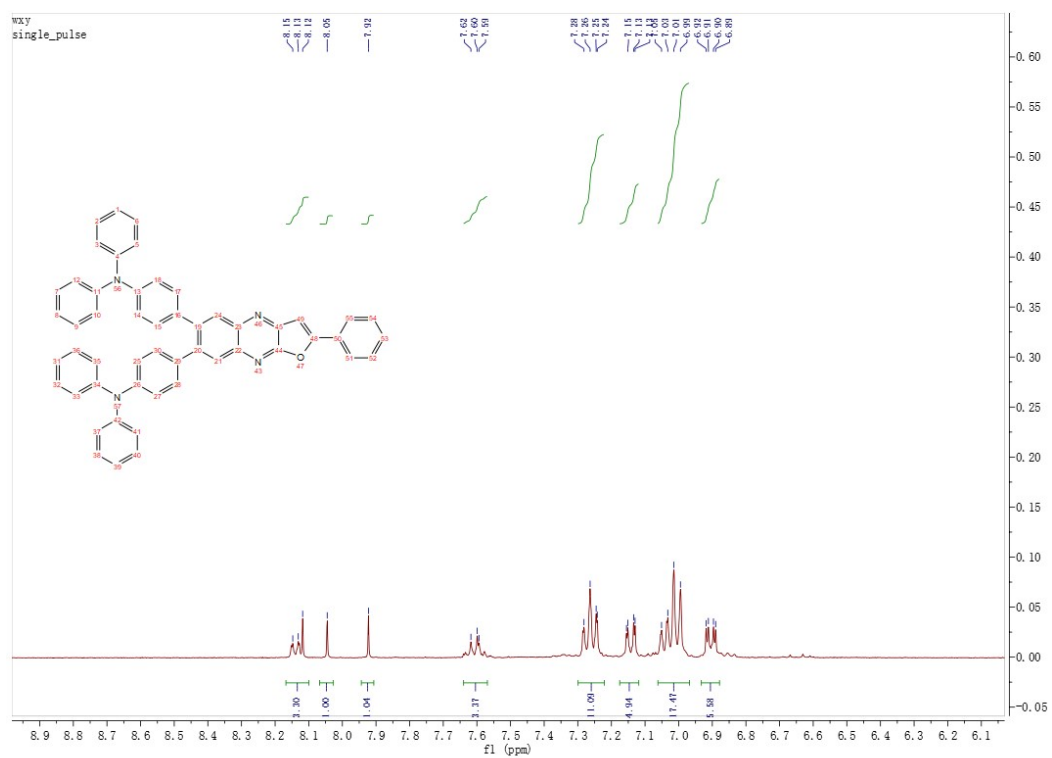

Figure S<sub>3</sub>  $^1\text{H}$  NMR spectrum of **67dTPA-FQ**

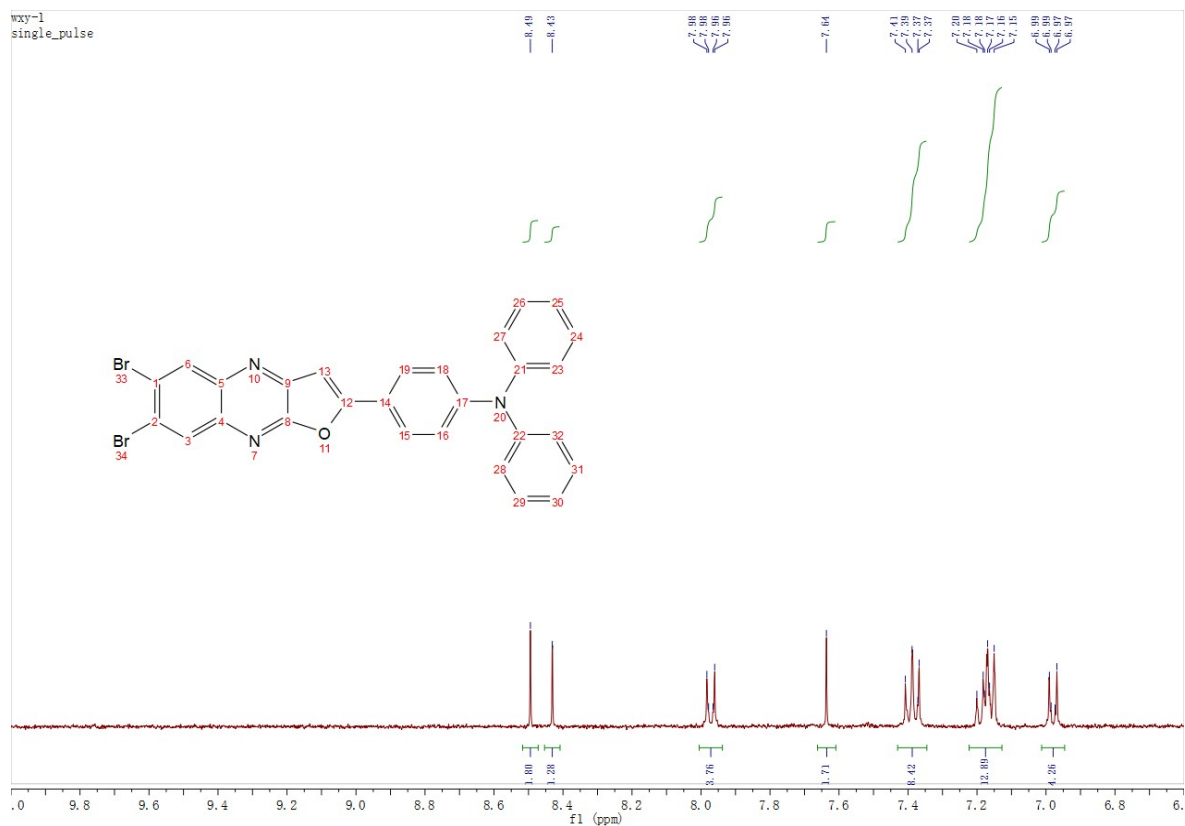

Figure S<sub>4</sub> <sup>1</sup>H NMR spectrum of **1b**

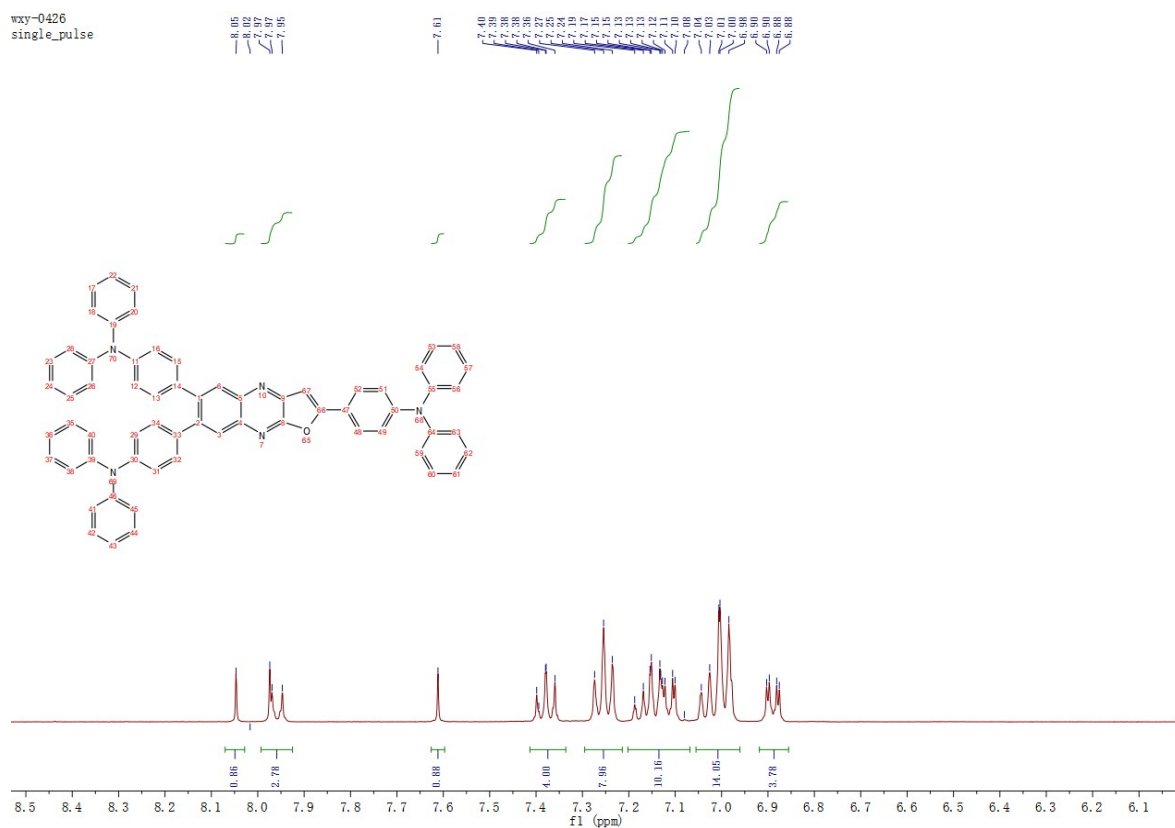

Figure S<sub>5</sub> <sup>1</sup>H NMR spectrum of **267tTPA-FQ**

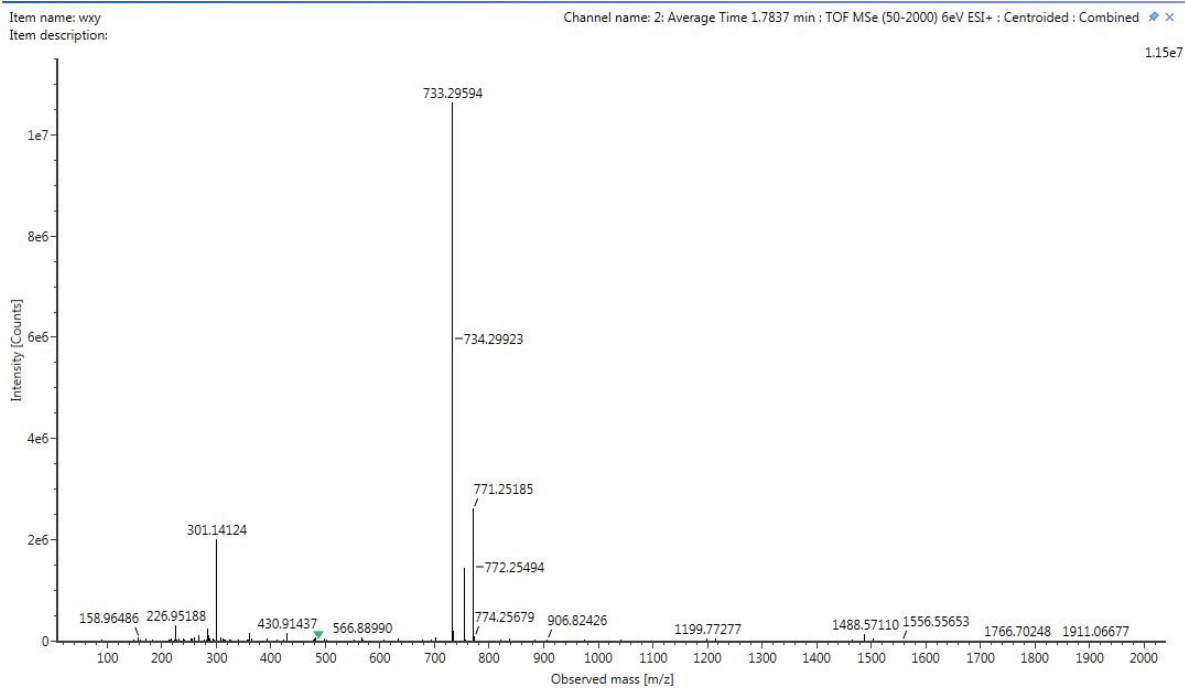

Figure S<sub>6</sub> HRMS spectrum of 67dTPA-FQ

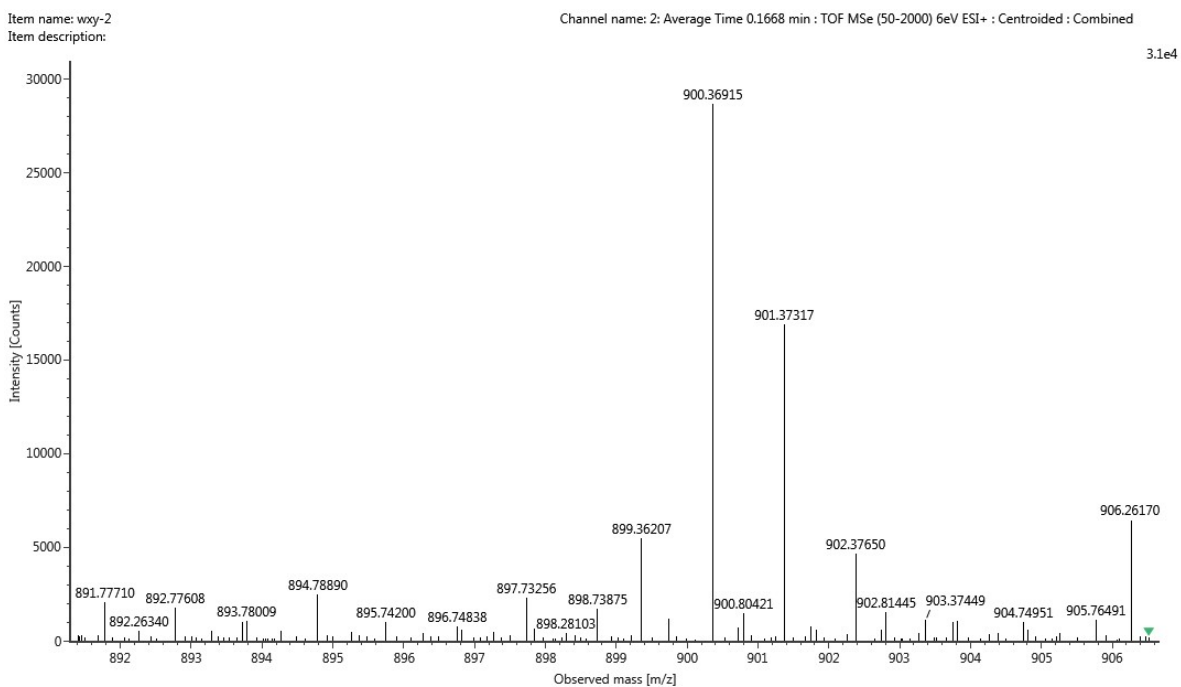

Figure S<sub>7</sub> HRMS spectrum of 267tTPA-FQ

## REFERENCE

- [1] M. J. Frisch, G. W. Trucks, H. B. Schlegel, G. E. Scuseria, M. A. Robb, J. R. Cheeseman, G. Scalmani, V. Barone, B. Mennucci, G. A. Petersson, H. Nakatsuji, M. Caricato, X. Li, H. P. Hratchian, A. F. Izmaylov, J. Bloino, G. Zheng, J. L. Sonnenberg, M. Hada, M. Ehara, K. Toyota, R. Fukuda, J. Hasegawa, M. Ishida, T. Nakajima, Y. Honda, O. Kitao, H. Nakai, T. Vreven, J. A. Montgomery Jr., J. E. Peralta, F. Ogliaro, M. Bearpark, J. J. Heyd, E. Brothers, K. N. Kudin, V. N. Staroverov, T. Keith, R. Kobayashi, J. Normand, K. Raghavachari, A. Rendell, J. C. Burant, S. S. Iyengar, J. Tomasi, M. Cossi, N. Rega, J. M. Millam, M. Klene, J. E. Knox, J. B. Cross, V. Bakken, C. Adamo, J. Jaramillo, R. Gomperts, R. E. Stratmann, O. Yazyev, A. J. Austin, R. Cammi, C. Pomelli, J. W. Ochterski, R. L. Martin, K. Morokuma, V. G. Zakrzewski, G. A. Voth, P. Salvador, J. J. Dannenberg, S. Dapprich, A. D. Daniels, O. Farkas, J. B. Foresman, J. V. Ortiz, J. Cioslowski, D. J. Fox, Gaussian 09, Revision C.01, Gaussian, Inc., Wallingford CT, 2010.
- [2] Liu, W.; Wang, F.; Dai, D.; Li, L.; Dolg, M. The Beijing Four-Component Density Functional Program Package (BDF) And Its Application to EuO, EuS, YbO and YbS. *Theor. Chem. Acc.* **1997**, *96*, 75-83.
- [3] Liu, W.; Hong, G.; Li, L. The Beijing Density Functional (BDF) Program Package: Methodologies and Applications, *J. Theor. Comput. Chem.* **2003**, *2*, 257-272.
- [4] Hirao, K.; Ishikawa, Y. Recent Advances in Computational Chemistry, World Scientific, Singapore, **2004**, *5*, p257.
- [5] Li, Z.; Xiao, Y.; Liu, W. On the Spin Separation of Algebraic Two-Component Relativistic Hamiltonians. *J. Chem. Phys.* **2012**, *137*, 154114.
